# Supplementary material
Source: bioRxiv or medRxiv preprint supplement (https://www.biorxiv.org/highwire/filestream/84913/field_highwire_adjunct_files/0/198994-1.pdf)
Supplement: Supplementary file [file 198994-1.pdf]

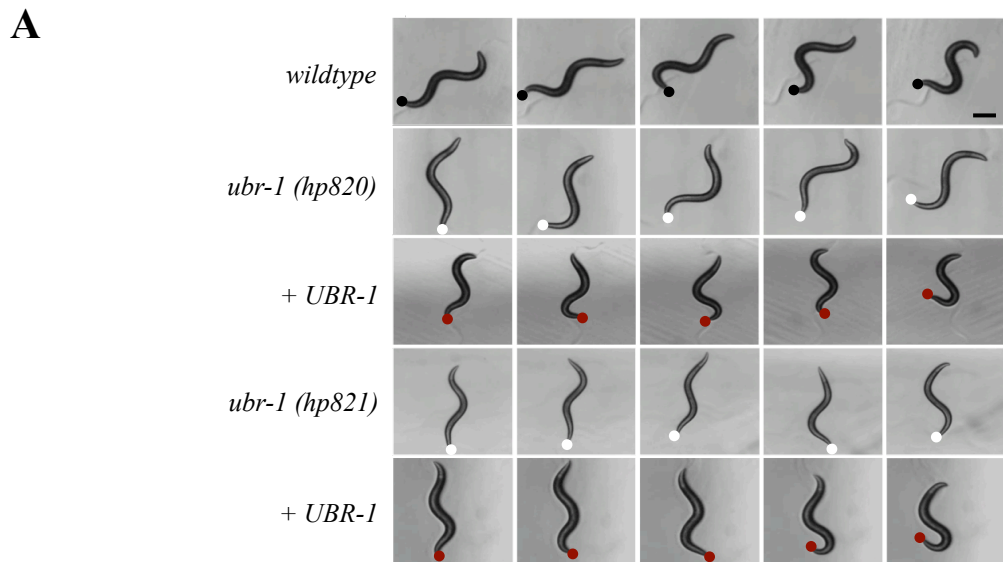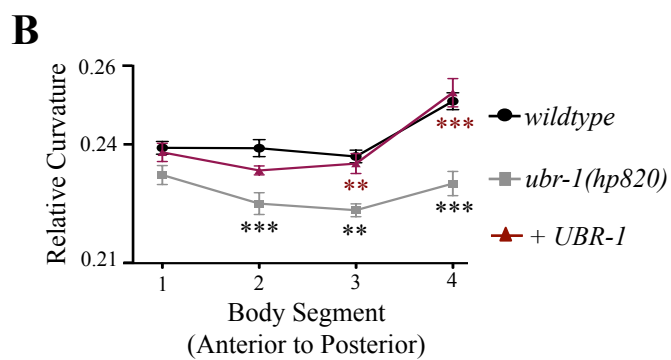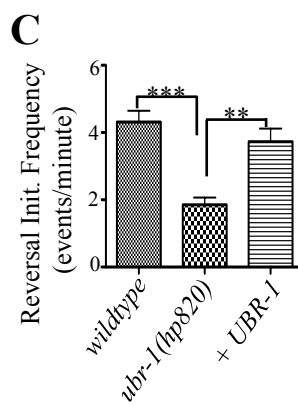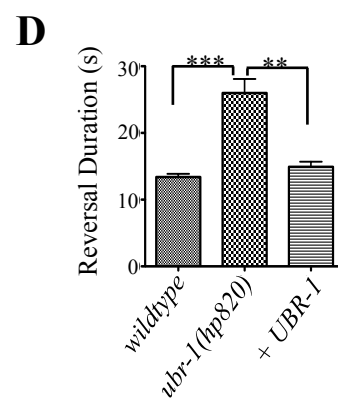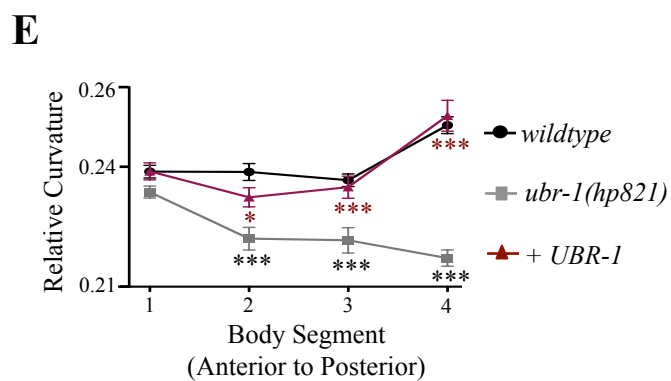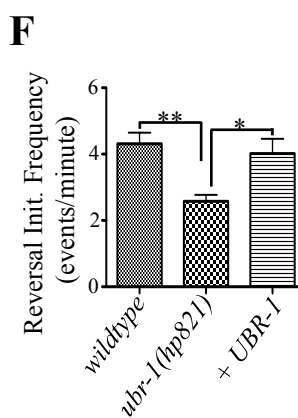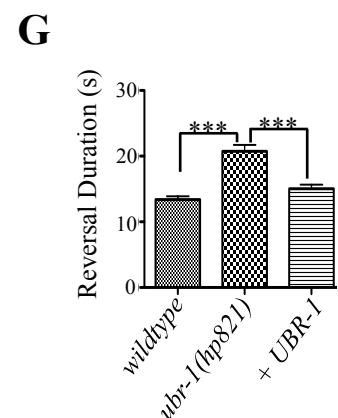

Figure S1

**A**

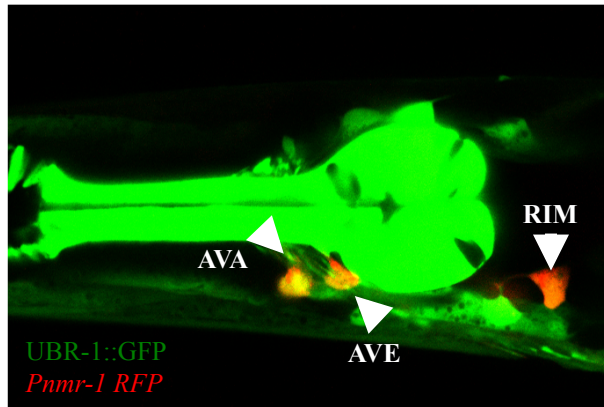

**B**

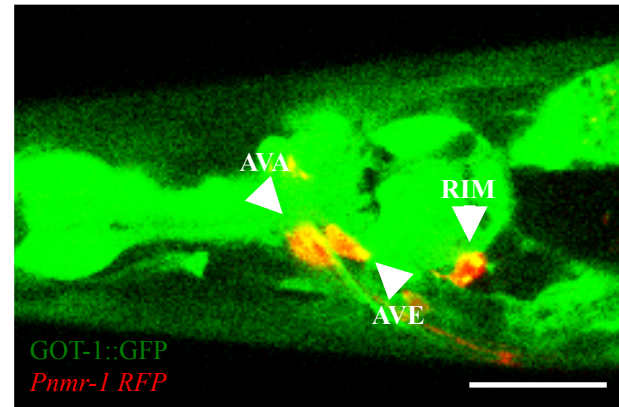

Figure S2

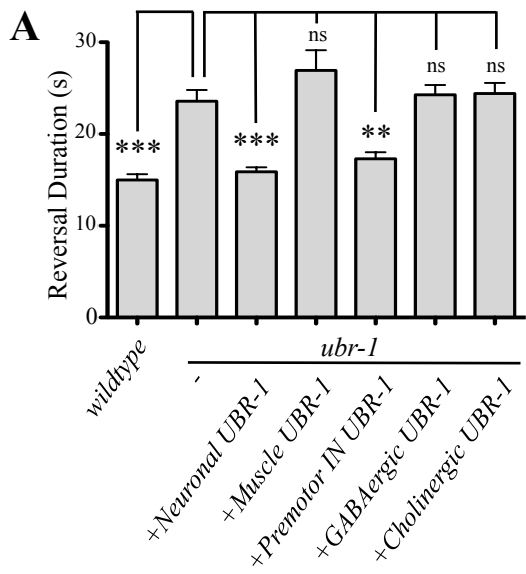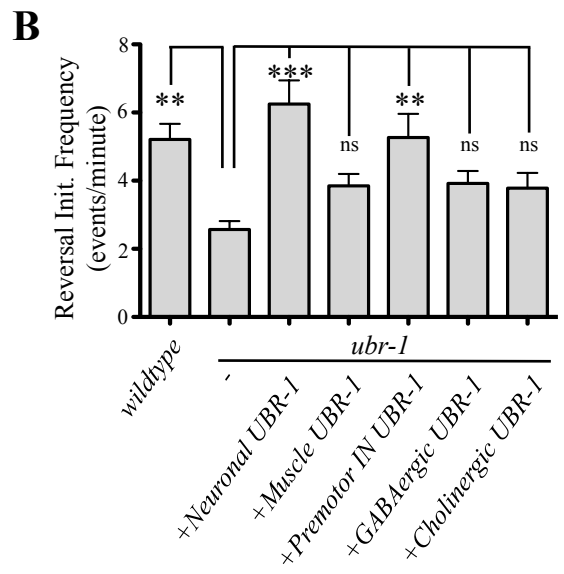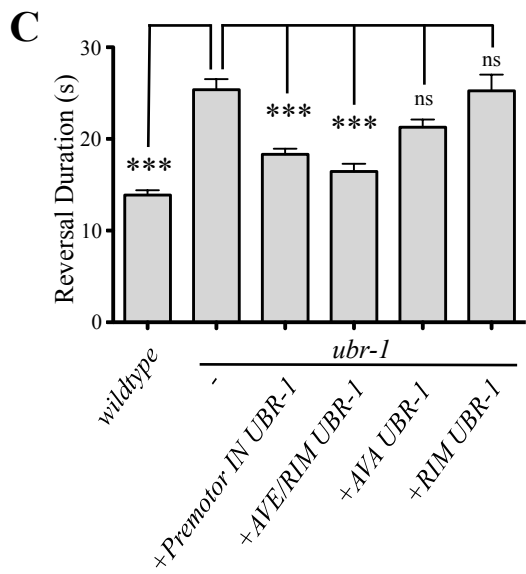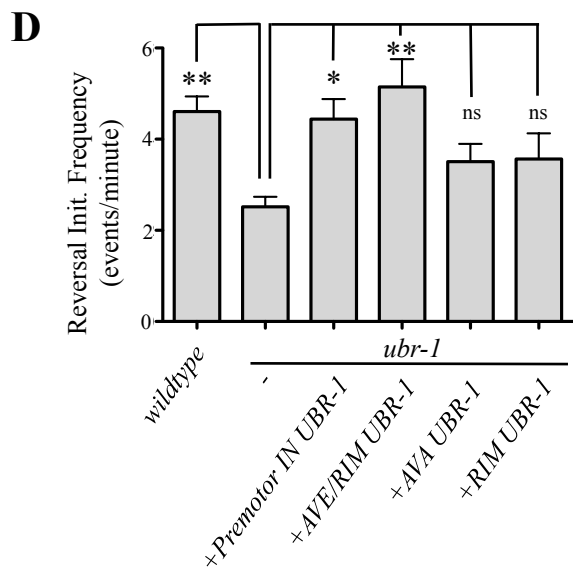

Figure S3

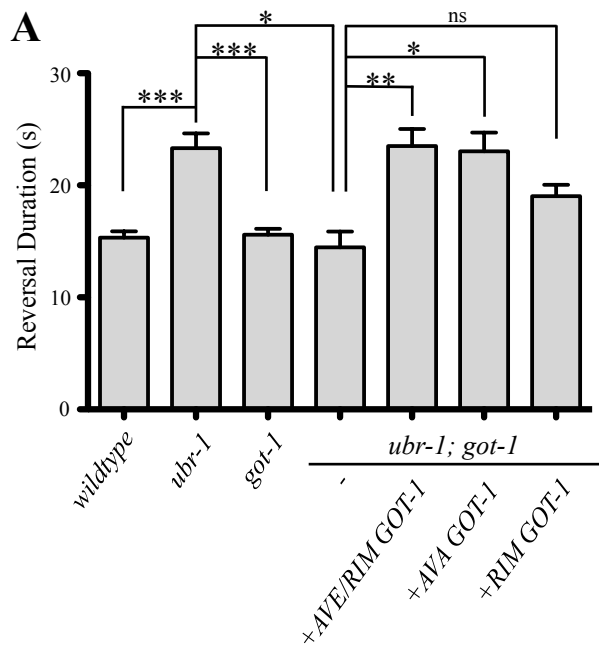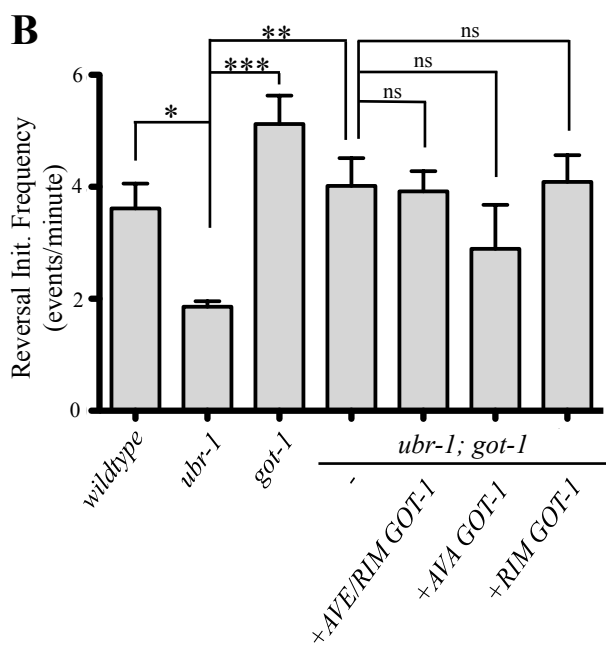

Figure S4

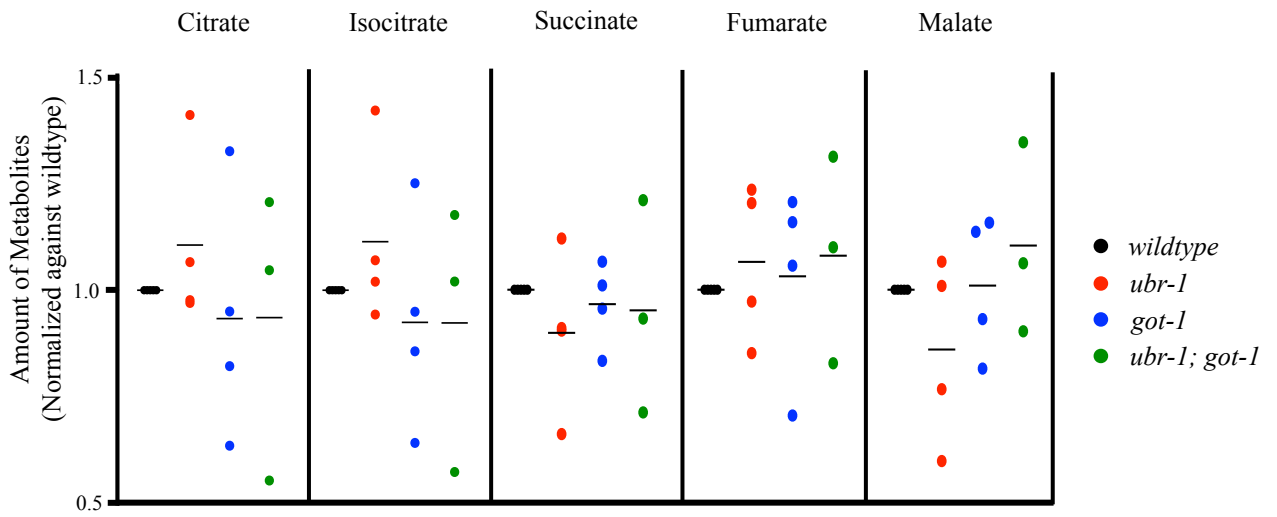

Figure S5

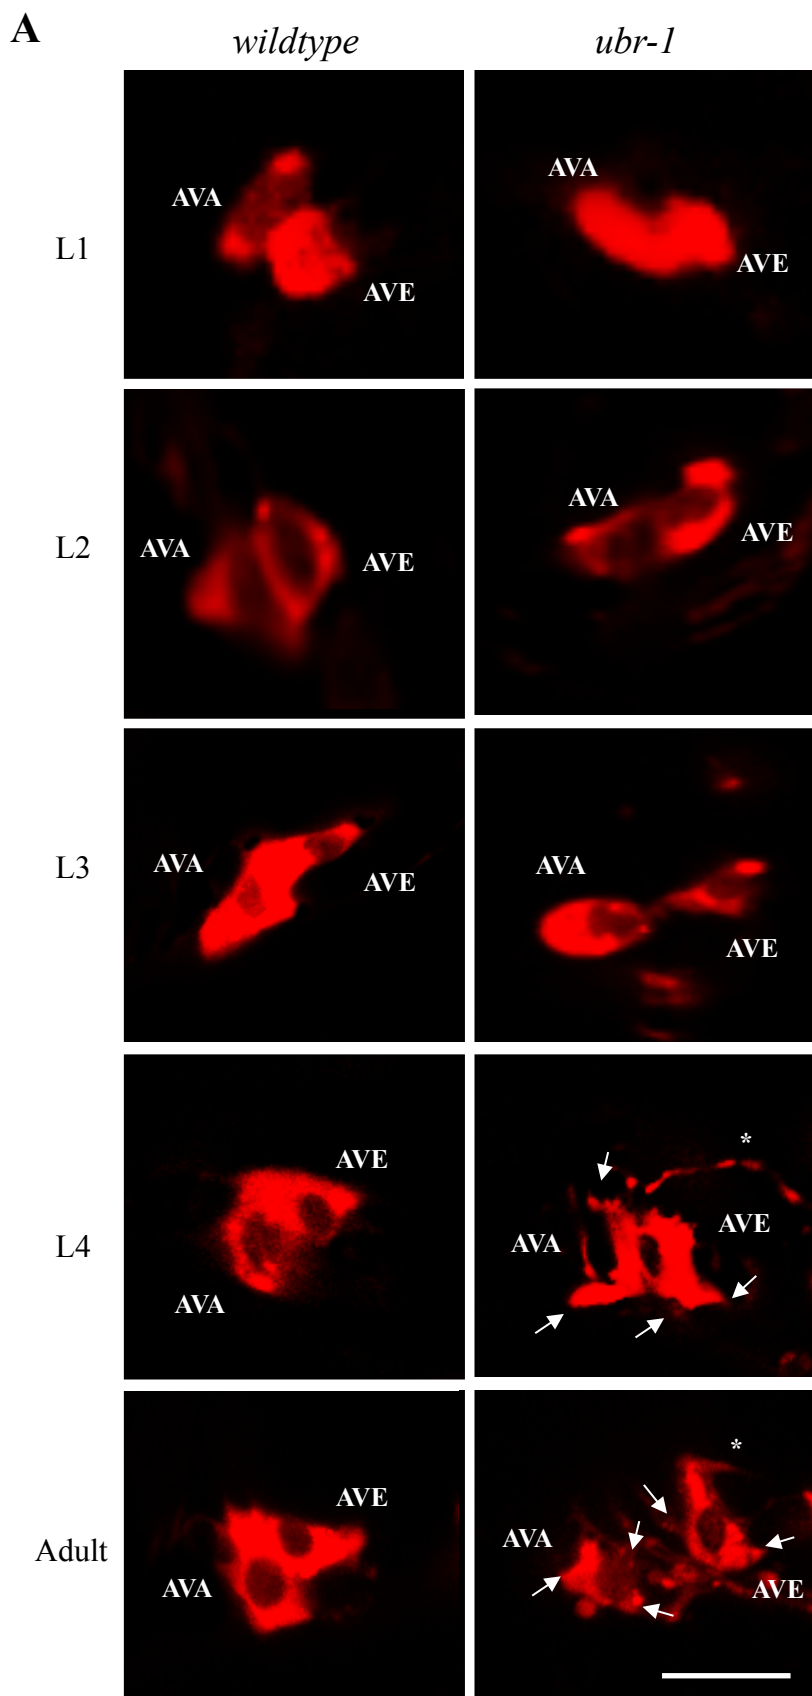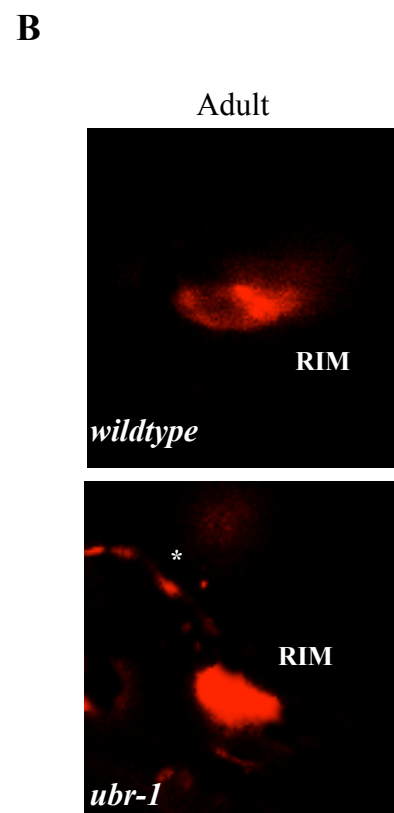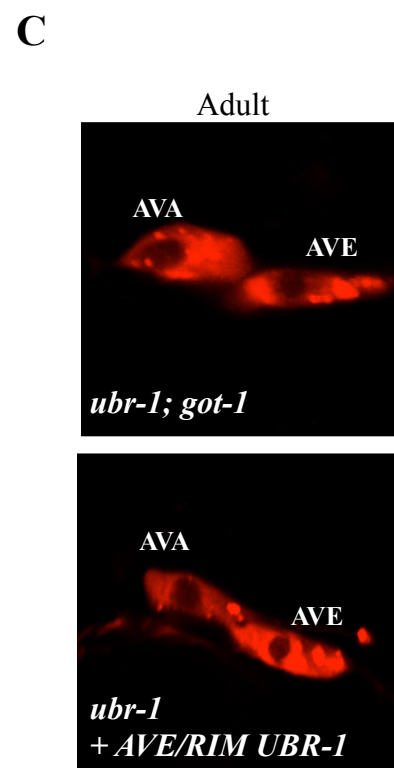

Figure S6
